# Supplementary material for: Protocol for a systematic review and meta-analysis of the placebo response in treatment-resistant depression: comparison of multiple treatment modalities
Source: PubMed Central journal article supplement — BMJ Open. 2021 Feb 16;11(2):e041349. doi: 10.1136/bmjopen-2020-041349 (PMC7888315; doi:10.1136/bmjopen-2020-041349), 2021-02-16
Supplement: bmjopen-2020-041349.draft_revisions.pdf [file bmjopen-2020-041349.draft_revisions.pdf]

# BMJ Open

BMJ Open is committed to open peer review. As part of this commitment we make the peer review history of every article we publish publicly available.

When an article is published we post the peer reviewers' comments and the authors' responses online. We also post the versions of the paper that were used during peer review. These are the versions that the peer review comments apply to.

The versions of the paper that follow are the versions that were submitted during the peer review process. They are not the versions of record or the final published versions. They should not be cited or distributed as the published version of this manuscript.

BMJ Open is an open access journal and the full, final, typeset and author-corrected version of record of the manuscript is available on our site with no access controls, subscription charges or pay-per-view fees (<http://bmjopen.bmj.com>).

If you have any questions on BMJ Open's open peer review process please email [info.bmjopen@bmj.com](mailto:info.bmjopen@bmj.com)

# BMJ Open

## Protocol for a systematic review and meta-analysis of the placebo response in treatment-resistant depression: Comparison of multiple treatment modalities

|                               |                                                                                                                                                                                                                                                                                                               |
|-------------------------------|---------------------------------------------------------------------------------------------------------------------------------------------------------------------------------------------------------------------------------------------------------------------------------------------------------------|
| Journal:                      | <i>BMJ Open</i>                                                                                                                                                                                                                                                                                               |
| Manuscript ID                 | bmjopen-2020-041349                                                                                                                                                                                                                                                                                           |
| Article Type:                 | Protocol                                                                                                                                                                                                                                                                                                      |
| Date Submitted by the Author: | 05-Jun-2020                                                                                                                                                                                                                                                                                                   |
| Complete List of Authors:     | Jones, Brett; Centre for Addiction and Mental Health,<br>Weissman, Cory; Centre for Addiction and Mental Health<br>Razza, Lais; Univ Sao Paulo<br>Husain, Muhammad; University of Toronto<br>Brunoni, Andre R.; Univ Sao Paulo<br>Daskalakis, Zafiris; Centre for Addiction and Mental Health, Temerty Centre |
| Keywords:                     | Depression & mood disorders < PSYCHIATRY, Adult psychiatry < PSYCHIATRY, Clinical trials < THERAPEUTICS                                                                                                                                                                                                       |
|                               |                                                                                                                                                                                                                                                                                                               |

SCHOLARONE™  
Manuscripts

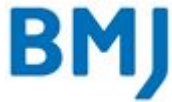

I, the Submitting Author has the right to grant and does grant on behalf of all authors of the Work (as defined in the below author licence), an exclusive licence and/or a non-exclusive licence for contributions from authors who are: i) UK Crown employees; ii) where BMJ has agreed a CC-BY licence shall apply, and/or iii) in accordance with the terms applicable for US Federal Government officers or employees acting as part of their official duties; on a worldwide, perpetual, irrevocable, royalty-free basis to BMJ Publishing Group Ltd ("BMJ") its licensees and where the relevant Journal is co-owned by BMJ to the co-owners of the Journal, to publish the Work in this journal and any other BMJ products and to exploit all rights, as set out in our [licence](#).

The Submitting Author accepts and understands that any supply made under these terms is made by BMJ to the Submitting Author unless you are acting as an employee on behalf of your employer or a postgraduate student of an affiliated institution which is paying any applicable article publishing charge ("APC") for Open Access articles. Where the Submitting Author wishes to make the Work available on an Open Access basis (and intends to pay the relevant APC), the terms of reuse of such Open Access shall be governed by a Creative Commons licence – details of these licences and which [Creative Commons](#) licence will apply to this Work are set out in our licence referred to above.

Other than as permitted in any relevant BMJ Author's Self Archiving Policies, I confirm this Work has not been accepted for publication elsewhere, is not being considered for publication elsewhere and does not duplicate material already published. I confirm all authors consent to publication of this Work and authorise the granting of this licence.

1  
2  
3  
4  
5  
6  
7  
8  
9

# Protocol for a systematic review and meta-analysis of the placebo response in treatment-resistant depression: Comparison of multiple treatment modalities

10  
11

## **Brett DM Jones, MD, MSc**

- 12  
13  
14  
15
- Department of Psychiatry, Faculty of Medicine, Centre for Addiction and Mental Health (CAMH), University of Toronto, Toronto, ON, Canada
  - brett.jones@mail.utoronto.ca

16  
17

## **Cory Weissman, MD**

- 18  
19  
20  
21
- Department of Psychiatry, Faculty of Medicine, Centre for Addiction and Mental Health (CAMH), University of Toronto, Toronto, ON, Canada
  - Cory.Weissman@camh.ca

22  
23

## **Lais B Razza**

- 24  
25  
26  
27  
28  
29  
30
- Department of Internal Medicine, Faculdade de Medicina da Universidade de São Paulo, São Paulo, Brazil; Laboratory of Neurosciences (LIM-27), Department and Institute of Psychiatry, Faculdade de Medicina da Universidade de São Paulo, São Paulo, Brazil; Center for Clinical and Epidemiological Research, Hospital Universitário, Universidade de São Paulo (HU-USP), Av. Prof Lineu Prestes 2565, Butantã, CEP 05508-000 São Paulo, Brazil
  - lais.razza@usp.br

31  
32

## **Muhammad I. Husain MBBS, MD(Res.), MRCPsych**

- 33  
34  
35  
36
- Department of Psychiatry, Faculty of Medicine, Centre for Addiction and Mental Health (CAMH), University of Toronto, Toronto, ON, Canada
  - Ishrat.husain@camh.ca

37  
38

## **Andre R Brunoni, MD PhD**

- 39  
40  
41  
42  
43  
44  
45  
46
- Department of Internal Medicine, Faculdade de Medicina da Universidade de São Paulo, São Paulo, Brazil; Laboratory of Neurosciences (LIM-27), Department and Institute of Psychiatry, Faculdade de Medicina da Universidade de São Paulo, São Paulo, Brazil; Center for Clinical and Epidemiological Research, Hospital Universitário, Universidade de São Paulo (HU-USP), Av. Prof Lineu Prestes 2565, Butantã, CEP 05508-000 São Paulo, Brazil
  - brunoni@usp.br

47  
48

## **Zafiris J Daskalakis, MD PhD (Corresponding Author)**

- 49  
50  
51  
52  
53  
54  
55  
56  
57  
58  
59  
60
- Department of Psychiatry, Faculty of Medicine, Centre for Addiction and Mental Health (CAMH), University of Toronto, Toronto, ON, Canada
  - Centre for Addiction and Mental Health, 100 Stokes Street, Toronto, Ontario, Canada, M6J 1H4
  - Jeff.daskalakis@camh.ca

1  
2  
3  
4  
5  
6  
7  
8  
9  
10  
11  
12  
13  
14  
15  
16  
17  
18  
19  
20  
21  
22  
23  
24  
25  
26  
27  
28  
29  
30  
31  
32  
33  
34  
35  
36  
37  
38  
39  
40  
41  
42  
43  
44  
45  
46  
47  
48  
49  
50  
51  
52  
53  
54  
55  
56  
57  
58  
59  
60

For peer review only

**Abstract:**

**Introduction:** The high placebo response in depression treatment trials is a major contributing factor for randomized control trial (RCT) failure to establish efficacy of novel or repurposed treatments in treatment resistant depression (TRD) and Major Depressive Disorder (MDD) in general. Though there have been a number of meta-analyses and primary research studies evaluating the placebo response in non-TRD depression, placebo response in TRD is poorly understood. It is important to understand the placebo response of TRD as treatments are only moderately effective and up to 1/3 of patients will experience treatment-resistant depression (TRD).

**Methods and Analysis:** We will conduct a search of electronic databases (MEDLINE and PsychINFO) from inception to January 24<sup>th</sup> 2020 including randomized, placebo-controlled controlled trials of pharmacological, somatic and psychological interventions for adults with TRD. TRD will be defined as a failure to respond to at least 2 interventions of adequate dose or duration. We will also search reference lists from review articles. We will perform several meta-analyses to quantify the placebo response for each treatment modality. Regression analysis will explore potential contributing demographic and clinical variables to the placebo response. We will utilize Cochrane risk of bias tool (ROB).

1  
2  
3 **Ethics and dissemination:** There is no research ethics board  
4 approval required. The dissemination plan is to publish results  
5 in a peer-reviewed academic journal.  
6  
7  
8  
9

10  
11  
12 Prospero ID: 190465  
13  
14  
15

16  
17 **Strengths and limitations of this study:**  
18  
19

20  
21 This analysis will be the first to exclusively study the placebo  
22 response in TRD.  
23  
24  
25

26  
27  
28 We will seek to quantify the placebo response among distinct  
29 treatment modalities.  
30  
31

32  
33  
34 The study will assess a large number of variables that may  
35 contribute to the placebo response.  
36  
37  
38

39  
40  
41 Direct statistical comparison between the placebo response of  
42 treatment modalities will not be done given the significant  
43 heterogeneity among treatment modalities.  
44  
45  
46  
47  
48  
49  
50

51  
52  
53  
54  
55 **Introduction:**  
56  
57  
58  
59  
60

1  
2  
3  
4  
5 The placebo response is the therapeutic effect produced by a  
6 placebo intervention that is not due to any inherent properties  
7 of the placebo itself. The high placebo response in large  
8 depression treatment trials is a major contributing factor for  
9 RCT failure to establish efficacy of novel and repurposed  
10 treatments (1). There have been several studies attempting to  
11 determine patient and study variables contributing to the  
12 placebo response in non-TRD depression. Variables found to  
13 contribute to the placebo response include year of publication,  
14 baseline severity, probability of being allocated to placebo  
15 arm, number of clinic centers, dosing schedule, length of trial,  
16 the magnitude active response, early score fluctuations, and  
17 inflation of baseline severity (2-10). The largest meta-analysis  
18 to date (252 studies, pooled n= 26,324) reported that the  
19 placebo response rate of anti-depressant medications has been  
20 stable over the last thirty years and ranges between 35% and 40%  
21 (11). While the placebo response is extensively investigated in  
22 non-TRD depression, there is a paucity of research into the  
23 magnitude of the placebo response in TRD.

24  
25  
26  
27  
28  
29  
30  
31  
32  
33  
34  
35  
36  
37  
38  
39  
40  
41  
42  
43  
44  
45  
46  
47  
48  
49  
50 TRD is defined by a lack of response to at least 2 separate  
51 treatments and imposes a heavy burden on the individual, their  
52 families, and society; through decreased quality of life,  
53  
54  
55  
56  
57  
58  
59  
60



1  
2  
3 increased morbidity and direct/indirect medical costs (12,13).  
4  
5 It is important to integrate novel treatments into clinical  
6  
7 practice; however, a high placebo response and negative clinical  
8  
9 trials has led to a delay in this regard. To address this gap,  
10  
11 it is important characterize and understand the placebo response  
12  
13 in TRD. Two meta-analyses have explored the placebo response in  
14  
15 repetitive transcranial magnetic stimulation (rTMS) trials,  
16  
17 including TRD and non-TRD patients which reported a large  
18  
19 placebo response (14,15). To date these are the only studies  
20  
21 attempting the characterize the placebo response in TRD.  
22  
23  
24  
25  
26 Currently, there is not a clear understanding as to what the  
27  
28 placebo response in TRD is, what contributes to it, and how it  
29  
30 may differ across various treatment modalities. Hence, we will  
31  
32 complete a systematic review and meta-analysis of randomized-  
33  
34 placebo-controlled trials in TRD. Our primary objective will be  
35  
36 to characterize the placebo response in TRD across various  
37  
38 treatment modalities. Our exploratory aim will be to determine  
39  
40 any demographic, clinical, and methodological characteristics  
41  
42 contribute to it. Characterizing and understanding what  
43  
44 contributes to the placebo response in TRD is a crucial step  
45  
46 towards the advancement of emerging treatments as well as  
47  
48 potentially harnessing the placebo response for patients.  
49  
50  
51  
52  
53  
54

#### 55 **Methods and Analysis:**

56  
57  
58  
59  
60

1  
2  
3  
4  
5 This protocol will be developed and reported in accordance with  
6 PRISMA statement.(16)  
7  
8  
9

## 10 11 12 **Eligibility Criteria:**

### 13 14 ***Participants and Setting:***

15  
16 We will include RCTs that recruited: TRD patients of any gender  
17 and between 18 and 65 years old. Treatment-resistant depression  
18 will be defined as patients with MDD as defined by The  
19 Diagnostic and Statistical Manual of Mental Disorders (DSM) III,  
20 IV, IV-R and 5 or international classification of diseases (ICD)  
21 9-10 that are currently in a depressive episode (17-19).

22  
23 Patients must have failed at least two trials of antidepressant  
24 medication within the current depressive episode with adequate  
25 dose and duration. Within class switches (e.g. 2 selective  
26 serotonin reuptake inhibitors (SSRI's) will be included as part  
27 of the TRD staging (20). Failed psychotherapy or brain  
28 stimulation trials will be included in the TRD staging. If a  
29 study reported that they included patients with 2 failed trials,  
30 but did not indicate whether this occurred within the current  
31 depressive episode, the study will be included as this is the  
32 most consistent definition of TRD (21-23). Patients from any  
33 setting (i.e. inpatient or outpatient) will be included.  
34  
35  
36  
37  
38  
39  
40  
41  
42  
43  
44  
45  
46  
47  
48  
49  
50  
51  
52  
53  
54  
55  
56  
57  
58  
59  
60

1  
2  
3 Psychiatric comorbidity will be included, if MDD is the primary  
4 psychiatric disorder being treated.  
5

6  
7 We will exclude: Studies that recruited patients with bipolar  
8 depression, unless 15% or less of the patients randomized were  
9 bipolar depression. Patients diagnosed with primary psychotic  
10 illness or active substance use disorders. Patients with  
11 neurological disorders, physical co-morbidities, or medical  
12 conditions will only be excluded if these diagnoses are the  
13 primary diagnosis (e.g. MDD in patients with diabetes or MDD in  
14 patients with multiple sclerosis). Studies with sample sizes  
15 less than 10 subjects (24). Studies that utilize a non-inert  
16 placebo.  
17  
18  
19  
20  
21  
22  
23  
24  
25  
26  
27  
28  
29  
30  
31

### 32 **Interventions:**

33  
34 We will include pharmacological and somatic therapies that are  
35 included in the Maudsley Treatment Inventory (MTI) (25). This  
36 inventory is derived from the Maudsley Prescribing Guidelines as  
37 well as other standardised guidelines for depression treatment.  
38  
39 We will also include novel and repurposed agents that have  
40 multiple meta-analysis supporting their use.  
41  
42  
43  
44  
45  
46  
47  
48  
49  
50

51 For psychological agents, we will include those from the NICE  
52 guidelines which includes computerised or face-to-face CBT,  
53 behavioural activation, interpersonal therapy, manualised  
54  
55  
56  
57  
58  
59  
60

1  
2  
3 psychodynamic therapy, behavioural couples' therapy, cognitive  
4 behavioural analysis system of psychotherapy, or mindfulness-  
5 based cognitive therapy. (22)  
6  
7  
8  
9  
10

11  
12 **Comparator:**  
13

14 Trials that include a placebo arm. Placebo will be defined as an  
15 inert oral medication, parental medication, sham device, or sham  
16 therapy that does not include any theoretical active property to  
17 induce the proposed therapeutic effect. Wait-list or treatment  
18 as usual will not be considered a placebo group for therapy  
19 trials.  
20  
21  
22  
23  
24  
25  
26  
27  
28  
29

30 **Study designs and publication types:**  
31

32 We will only include parallel arm, randomized double-blind  
33 placebo-controlled trials. We will include cross-over studies if  
34 they report outcomes before the cross-over. Trials must include  
35 randomization to at least 1 placebo arm.  
36  
37  
38  
39  
40  
41  
42  
43

44 **Language and Timeframe:**  
45

46 Studies to be included will be published in English or  
47 Portuguese. Attempts to translate other languages will also be  
48 made. Time frame of included studies will be from the date of  
49 inception until January 24<sup>th</sup> 2020.  
50  
51  
52  
53  
54  
55  
56  
57  
58  
59  
60

**Information Source and Search Strategy:**

The electronic databases MEDLINE and PsychInfo will be searched. Key terms, notable papers and citation lists will also be reviewed for additional studies. The following search terms will be used in addition to mapping key terms: (depress\* OR MDD OR major depress\*) AND (resistan\* OR refractor\* OR non-respon\* OR nonrespon\* OR un-respon\* OR unrespon\* OR TRD OR fail\* OR inadequate OR difficult OR intractable) AND (Placebo OR sham OR control OR controlled) AND (randomi\* OR RCT) AND (treatment OR intervention OR trial).

**Study Records:**

**Study Selection and Data Extraction:** Two authors will independently screen the abstracts and full-texts to decide on their inclusion based on predefined inclusion criteria. Any discrepancies of inclusion or extraction will be discussed between the two authors, and a third author will resolve any further conflicts. Two authors will then extract data which will include description of the interventions and control group, demographics, clinical data, and quality assessment.

**Outcomes:****Primary outcome:**

The primary outcome will be 'placebo response' as measured by Cohen's d effect size of the change in the primary outcome variable (i.e. depression symptom rating scales) from baseline

1  
2  
3 to primary endpoint. Where multiple outcomes are reported, the  
4 primary outcome for inclusion in analyses will be selected in a  
5 hierarchical fashion: the most preferable scale will be a  
6 clinician-rated assessment of depression severity (HAM-D, MADRS,  
7 IDS or validated subscales of these), followed by a patient-  
8 rated measure (PHQ-9, IDS or BDI). Where multiple endpoints are  
9 reported, this review will consider the acute endpoint as the  
10 primary endpoint. If the study only reports a delayed endpoint,  
11 this will be recorded and controlled for.  
12  
13  
14  
15  
16  
17  
18  
19  
20  
21  
22  
23  
24  
25

26 *Secondary outcomes:*

- 27  
28 1. Response rate measured by the total number of patients who  
29 had a reduction of  $\geq 50\%$  of the total score on a standardized  
30 rating scale for depression.  
31  
32  
33  
34 2. Remission rates as measured by a standardized rating scale  
35 for depression  
36  
37  
38  
39  
40

41 **Assessment of risk bias:**

42 We will utilize the Cochrane risk of Bias (RoB) tool. This tool  
43 assesses bias across five domains five domains (selection,  
44 performance, attrition, reporting, and other). A sensitivity  
45 analysis will assess the difference in statistical effects  
46 between studies with a high and low risk of bias.  
47  
48  
49  
50  
51  
52  
53  
54  
55  
56  
57  
58  
59  
60

**Data Synthesis:**

Qualitative data will be analyzed, and sufficiently homogenous studies will be aggregated based upon similarity of patient characteristics, treatment modality, as well as study design. We will conduct a pairwise meta-analysis within each modality.

Placebo effect size will be determined by Hedge's  $g$ , which will be calculated based on reported means and standard deviations (SD) from baseline and endpoint of each study. A random-effects model will be used to perform this calculation. When necessary, we will impute SD based on graphs, standard errors, or confidence intervals provided in the published reports. The pooled effect size for each study will be calculated by the inverse variance of each study.

We will perform an explanatory analysis on factors affecting the placebo response using a univariate meta-regression. Several univariate meta-regressions will be performed for each treatment modality. Factors chosen will be dependent on data availability, however, examples include: methodological factors, publication year, number of study sites, study setting, number of treatment arms, industry sponsorship, duration of study, number of times placebo was measured, number of days receiving placebo, dosing (e.g. once daily vs twice daily), presence of a placebo run-in, augmentation vs monotherapy treatment strategy, and study

1  
2  
3 quality, as well as demographic factors (e.g. age, gender, and  
4 race/ethnicity), and clinical factors (e.g. number of failed  
5 trials in the current episode, recurrence of illness, age of  
6 onset, baseline severity, and effect size of the active group).  
7  
8 For univariate meta-regression analyses, significant values will  
9  
10 be considered as  $p < 0.05$ .  
11  
12

13  
14 We will perform sensitivity analysis, cumulative regression and  
15 assess publication bias using Begg-modified funnel plot and  
16  
17 Egger test (26). Heterogeneity will be evaluated with a Chi-  
18  
19 square test.  
20  
21  
22  
23  
24

#### 25 26 27 28 **Confidence of cumulative evidence:**

29  
30 The Grading of Recommendations, Assessment, Development and  
31  
32 Evaluations (GRADE) approach will be utilized the rank the  
33  
34 quality of the evidence in making recommendations of what the  
35  
36 placebo response in TRD is.  
37  
38

#### 39 40 **Patient and Public involvement:**

41  
42 TRD is a very significant public health concern. As there is no  
43  
44 direct patient involvement in this study, we have decided to not  
45  
46 include patients and public in the development in the protocol.  
47

#### 48 49 **Discussion:**

50  
51 A placebo-controlled clinical trial is the gold-standard for  
52  
53 establishing efficacy of a proposed active treatment. While  
54  
55 there is a well-established understanding of the placebo  
56  
57  
58  
59



1  
2  
3 response in treatment naive MDD, there is not a clear  
4  
5 understanding of the placebo response in TRD. Furthermore, the  
6  
7 analyses of the placebo response in non-TRD focuses almost  
8  
9 entirely on the placebo response as it relates to oral  
10  
11 medications. This has implications on the transferability of  
12  
13 this knowledge to TRD as this patient population frequently  
14  
15 utilizes somatic and novel treatments. The objective of this  
16  
17 study is to better quantify the placebo response in TRD, its  
18  
19 contributing factors, and how it may differ between treatment  
20  
21 modalities. This knowledge will help clinicians and researchers  
22  
23 interpret past and future studies as well as improve the design  
24  
25 and development of future trials. With an established placebo  
26  
27 response, study designs such a non-inferiority, can be utilized  
28  
29 with improved confidence. Lastly, this knowledge would have  
30  
31 implications of how care can be delivered and improved for  
32  
33 patients with TRD.  
34  
35  
36  
37  
38

39 **Ethics and dissemination:** There is no research ethics board  
40  
41 approval required. The dissemination plan is to publish results  
42  
43 in a peer-reviewed academic journal.  
44  
45  
46  
47  
48  
49  
50

51  
52 **Reference:**  
53  
54

- 55 1. N. Fountoulakis K, S. McIntyre R, F. Carvalho A. From  
56  
57  
58  
59  
60

- 1  
2  
3 Randomized Controlled Trials of Antidepressant Drugs to the  
4 Meta-Analytic Synthesis of Evidence: Methodological Aspects  
5 Lead to Discrepant Findings.  
6
- 7 2. Timothy Walsh B, Seidman SN, Sysko R, Gould M. Placebo  
8 response in studies of major depression: Variable,  
9 substantial, and growing. Vol. 287, Journal of the American  
10 Medical Association. American Medical Association; 2002. p.  
11 1840-7.  
12
  - 13 3. Khan A, Bhat A, Kolts R, Thase ME, Brown W. Why has the  
14 antidepressant-placebo difference in antidepressant clinical  
15 trials diminished over the past three decades? CNS Neurosci  
16 Ther. 2010;16(4):217-26.  
17
  - 18 4. Sinyor M, Levitt A, Cheung A, ... AS-TJ of clinical, 2010  
19 undefined. Does inclusion of a placebo arm influence  
20 response to active antidepressant treatment in randomized  
21 controlled trials? Results from pooled and meta-analyses.  
22 psycnet.apa.org [Internet]. [cited 2020 Apr 13]; Available  
23 from: <https://psycnet.apa.org/record/2012-02346-008>  
24
  - 25 5. Iovieno N, Popakostas GI. Does the presence of an open-label  
26 antidepressant treatment period influence study outcome in  
27 clinical trials examining augmentation/combination  
28 strategies in treatment partial responders/nonresponders  
29 with major depressive disorder? J Clin Psychiatry  
30 [Internet]. 2012 May;73(5):676-83. Available from:  
31 [http://myaccess.library.utoronto.ca/login?url=https://search](http://myaccess.library.utoronto.ca/login?url=https://search.proquest.com/docview/1373442277?accountid=14771)  
32 [.proquest.com/docview/1373442277?accountid=14771](http://myaccess.library.utoronto.ca/login?url=https://search.proquest.com/docview/1373442277?accountid=14771)  
33
  - 34 6. Khan A, Khan S, Walens G, ... RK-, 2003 undefined. Frequency  
35 of positive studies among fixed and flexible dose  
36 antidepressant clinical trials: An analysis of the Food and  
37 Drug Administration summary basis of. nature.com [Internet].  
38 [cited 2020 Apr 13]; Available from:  
39 <https://www.nature.com/articles/1300059>  
40
  - 41 7. Landin R, DeBroda DJ, DeVries TA, Potter WZ, Demitrack MA.  
42 The Impact of Restrictive Entry Criterion During the Placebo  
43 Lead-in Period. Biometrics [Internet]. 2000 Mar 1 [cited  
44 2020 Apr 13];56(1):271-8. Available from:  
45 <http://doi.wiley.com/10.1111/j.0006-341X.2000.00271.x>  
46
  - 47 8. Rutherford B, Cooper T, ... AP-TJ of clinical, 2013  
48 undefined. Less is more in antidepressant clinical trials: a  
49 meta-analysis of the effect of visit frequency on treatment  
50 response and drop-out. ncbi.nlm.nih.gov [Internet]. [cited  
51 2020 Apr 13]; Available from:  
52
  - 53
  - 54
  - 55
  - 56
  - 57
  - 58
  - 59

- 1  
2  
3 <https://www.ncbi.nlm.nih.gov/pmc/articles/PMC3898620/>  
4
- 5 9. Whitlock ME, Woodward PW, Alexander RC. Is high placebo  
6 response really a problem in depression trials? A critical  
7 re-analysis of depression studies. *Innov Clin Neurosci*.  
8 2019;16(7-8):12-7.  
9
- 10 10. Targum SD, Cameron BR, Ferreira L, MacDonald ID. Early score  
11 fluctuation and placebo response in a study of major  
12 depressive disorder. *J Psychiatr Res*. 2020 Feb 1;121:118-25.  
13
- 14 11. Furukawa TA, Cipriani A, Atkinson LZ, Leucht S, Ogawa Y,  
15 Takeshima N, et al. Placebo response rates in antidepressant  
16 trials: a systematic review of published and unpublished  
17 double-blind randomised controlled studies. *The Lancet*  
18 *Psychiatry*. 2016 Nov 1;3(11):1059-66.  
19  
20
- 21 12. Rush AJ, Warden D, Wisniewski SR, Fava M, Trivedi MH, Gaynes  
22 BN, et al. STAR\*D: Revising conventional wisdom. *CNS Drugs*  
23 [Internet]. 2009 Aug 8;23(8):627-47. Available from:  
24 [http://myaccess.library.utoronto.ca/login?url=https://search](http://myaccess.library.utoronto.ca/login?url=https://search.proquest.com/docview/622067060?accountid=14771)  
25 [.proquest.com/docview/622067060?accountid=14771](http://myaccess.library.utoronto.ca/login?url=https://search.proquest.com/docview/622067060?accountid=14771)  
26  
27
- 28 13. Johnston KM, Powell LC, Anderson IM, Szabo S, Cline S. The  
29 burden of treatment-resistant depression: A systematic  
30 review of the economic and quality of life literature. Vol.  
31 242, *Journal of Affective Disorders*. Elsevier B.V.; 2019. p.  
32 195-210.  
33
- 34 14. Razza LB, Moffa AH, Moreno ML, Carvalho AF, Padberg F,  
35 Fregni F, et al. A systematic review and meta-analysis on  
36 placebo response to repetitive transcranial magnetic  
37 stimulation for depression trials. *Prog Neuropsychopharmacol*  
38 *Biol Psychiatry* [Internet]. 2018 Feb 2;81:105-13. Available  
39 from:  
40 [http://myaccess.library.utoronto.ca/login?url=https://search](http://myaccess.library.utoronto.ca/login?url=https://search.proquest.com/docview/1970301414?accountid=14771)  
41 [.proquest.com/docview/1970301414?accountid=14771](http://myaccess.library.utoronto.ca/login?url=https://search.proquest.com/docview/1970301414?accountid=14771)  
42  
43
- 44 15. Brunoni AR, Lopes M, Kaptchuk TJ, Fregni F. Placebo response  
45 of non-pharmacological and pharmacological trials in major  
46 depression: a systematic review and meta-analysis. *PLoS One*  
47 [Internet]. 2009 Mar 18 [cited 2020 Apr 3];4(3):e4824.  
48 Available from: <http://www.ncbi.nlm.nih.gov/pubmed/19293925>  
49
- 50 16. Shamseer L, Moher D, Clarke M, Gherzi D, Liberati A,  
51 Petticrew M, et al. Preferred reporting items for systematic  
52 review and meta-analysis protocols (prisma-p) 2015:  
53 Elaboration and explanation. *BMJ (Online)*. 2015.  
54  
55
- 56 17. WHO. The ICD-10 Classification of Mental and Behavioural  
57  
58  
59

- Disorders Clinical descriptions and diagnostic guidelines  
World Health Organization [Internet]. [cited 2018 Oct 10].  
Available from:  
<http://www.who.int/classifications/icd/en/bluebook.pdf>
18. First M, Gibbon M, Spitzer R, Williams J. User Guide for the Structural Clinical Interview for DSM-IV Axis I Disorders. APA. Washington, DC: American Psychiatric Association; 1996.
  19. Diagnostic and Statistical Manual of mental disorders (4ed). 4th ed. Washington, DC: American Psychiatric Association; 1994.
  20. Papakostas GI, Fava M, Thase ME. Treatment of SSRI-resistant depression: A meta-analysis comparing within- versus across-class switches. *Biol Psychiatry* [Internet]. 2008 Apr;63(7):699-704. Available from:  
<http://myaccess.library.utoronto.ca/login?url=https://search.proquest.com/docview/622141982?accountid=14771>
  21. Souery D, Amsterdam J, de Montigny C, Lecrubier Y, Montgomery S, Lipp O, et al. Treatment resistant depression: methodological overview and operational criteria. *Eur Neuropsychopharmacol* [Internet]. 1999 Jan [cited 2018 Oct 10];9(1-2):83-91. Available from:  
<http://www.ncbi.nlm.nih.gov/pubmed/10082232>
  22. NICE. Depression in Adults (update) Depression: the treatment and management of depression in adults National Clinical Practice Guideline Number X National Collaborating Centre for Mental Health Commissioned by the National Institute for Health and Clinical Exc. 2007.
  23. Anderson I, Ferrier I, Baldwin R, Cowen P, Howard L, Lewis G, et al. Evidence-based guidelines for treating depressive disorders with antidepressants: A revision of the 2000 British Association for Psychopharmacology guidelines. *J Psychopharmacol* [Internet]. 2008 Jun 15 [cited 2018 Oct 11];22(4):343-96. Available from:  
<http://www.ncbi.nlm.nih.gov/pubmed/18413657>
  24. Bandelow B, Reitt M, Röver C, Michaelis S, Görlich Y, Wedekind D. Efficacy of treatments for anxiety disorders. *Int Clin Psychopharmacol* [Internet]. 2015 Jul [cited 2018 Oct 10];30(4):183-92. Available from:  
<http://www.ncbi.nlm.nih.gov/pubmed/25932596>
  25. Fekadu A, Wooderson SC, Markopoulou K, Cleare AJ. The Maudsley Staging Method for treatment-resistant depression:

1  
2  
3 Prediction of longer-term outcome and persistence of  
4 symptoms. J Clin Psychiatry [Internet]. 2009 Jul;70(7):952-  
5 7. Available from:  
6 [http://myaccess.library.utoronto.ca/login?url=https://search](http://myaccess.library.utoronto.ca/login?url=https://search.proquest.com/docview/622097738?accountid=14771)  
7 [.proquest.com/docview/622097738?accountid=14771](http://myaccess.library.utoronto.ca/login?url=https://search.proquest.com/docview/622097738?accountid=14771)  
8  
9

- 10 26. Egger M, Smith GD, Schneider M, Minder C. Bias in meta-  
11 analysis detected by a simple , graphical test measures of  
12 funnel plot asymmetry. Bmj [Internet]. 1997 [cited 2020 Mar  
13 30];315(7109):629-34. Available from:  
14 <http://www.ncbi.nlm.nih.gov/pubmed/9310563>  
15 <http://www.ncbi.nlm.nih.gov/pubmed/9310563>  
16 <http://www.ncbi.nlm.nih.gov/pubmed/9310563>  
17 <http://www.ncbi.nlm.nih.gov/pubmed/9310563>  
18 <http://www.ncbi.nlm.nih.gov/pubmed/9310563>  
19 <http://www.ncbi.nlm.nih.gov/pubmed/9310563>  
20 <http://www.ncbi.nlm.nih.gov/pubmed/9310563>  
21 <http://www.ncbi.nlm.nih.gov/pubmed/9310563>  
22 <http://www.ncbi.nlm.nih.gov/pubmed/9310563>  
23 <http://www.ncbi.nlm.nih.gov/pubmed/9310563>  
24 <http://www.ncbi.nlm.nih.gov/pubmed/9310563>  
25 <http://www.ncbi.nlm.nih.gov/pubmed/9310563>  
26 <http://www.ncbi.nlm.nih.gov/pubmed/9310563>  
27 <http://www.ncbi.nlm.nih.gov/pubmed/9310563>  
28 <http://www.ncbi.nlm.nih.gov/pubmed/9310563>  
29 <http://www.ncbi.nlm.nih.gov/pubmed/9310563>  
30 <http://www.ncbi.nlm.nih.gov/pubmed/9310563>  
31 <http://www.ncbi.nlm.nih.gov/pubmed/9310563>  
32 <http://www.ncbi.nlm.nih.gov/pubmed/9310563>  
33 <http://www.ncbi.nlm.nih.gov/pubmed/9310563>  
34 <http://www.ncbi.nlm.nih.gov/pubmed/9310563>  
35 <http://www.ncbi.nlm.nih.gov/pubmed/9310563>  
36 <http://www.ncbi.nlm.nih.gov/pubmed/9310563>  
37 <http://www.ncbi.nlm.nih.gov/pubmed/9310563>  
38 <http://www.ncbi.nlm.nih.gov/pubmed/9310563>  
39 <http://www.ncbi.nlm.nih.gov/pubmed/9310563>  
40 <http://www.ncbi.nlm.nih.gov/pubmed/9310563>  
41 <http://www.ncbi.nlm.nih.gov/pubmed/9310563>  
42 <http://www.ncbi.nlm.nih.gov/pubmed/9310563>  
43 <http://www.ncbi.nlm.nih.gov/pubmed/9310563>  
44 <http://www.ncbi.nlm.nih.gov/pubmed/9310563>  
45 <http://www.ncbi.nlm.nih.gov/pubmed/9310563>  
46 <http://www.ncbi.nlm.nih.gov/pubmed/9310563>  
47 <http://www.ncbi.nlm.nih.gov/pubmed/9310563>  
48 <http://www.ncbi.nlm.nih.gov/pubmed/9310563>  
49 <http://www.ncbi.nlm.nih.gov/pubmed/9310563>  
50 <http://www.ncbi.nlm.nih.gov/pubmed/9310563>  
51 <http://www.ncbi.nlm.nih.gov/pubmed/9310563>  
52 <http://www.ncbi.nlm.nih.gov/pubmed/9310563>  
53 <http://www.ncbi.nlm.nih.gov/pubmed/9310563>  
54 <http://www.ncbi.nlm.nih.gov/pubmed/9310563>  
55 <http://www.ncbi.nlm.nih.gov/pubmed/9310563>  
56 <http://www.ncbi.nlm.nih.gov/pubmed/9310563>  
57 <http://www.ncbi.nlm.nih.gov/pubmed/9310563>  
58 <http://www.ncbi.nlm.nih.gov/pubmed/9310563>  
59 <http://www.ncbi.nlm.nih.gov/pubmed/9310563>  
60 <http://www.ncbi.nlm.nih.gov/pubmed/9310563>

**Authors' contributions:** All authors included have; made an  
exceptional contribution to the design/conception of the  
protocol; has approved the submitted version; and has agreed to  
be accountable for the accuracy and integrity of this work.

**Funding statement:** This research received no specific grant  
from any funding agency in the public, commercial or not-for-  
profit sectors.

**Competing interests' statement:** There are no competing interests  
to report.

**Patient consent for publication** Not required

**PRISMA-P (Preferred Reporting Items for Systematic review and Meta-Analysis Protocols) 2015 checklist: recommended items to address in a systematic review protocol\***

| Section and topic                 | Item No | Checklist item                                                                                                                                                                                                                | (Page No.#) |
|-----------------------------------|---------|-------------------------------------------------------------------------------------------------------------------------------------------------------------------------------------------------------------------------------|-------------|
| <b>ADMINISTRATIVE INFORMATION</b> |         |                                                                                                                                                                                                                               |             |
| Title:                            |         |                                                                                                                                                                                                                               |             |
| Identification                    | 1a      | Identify the report as a protocol of a systematic review                                                                                                                                                                      | 1           |
| Update                            | 1b      | If the protocol is for an update of a previous systematic review, identify as such                                                                                                                                            | N/A         |
| Registration                      | 2       | If registered, provide the name of the registry (such as PROSPERO) and registration number                                                                                                                                    | 2           |
| Authors:                          |         |                                                                                                                                                                                                                               |             |
| Contact                           | 3a      | Provide name, institutional affiliation, e-mail address of all protocol authors; provide physical mailing address of corresponding author                                                                                     | 1           |
| Contributions                     | 3b      | Describe contributions of protocol authors and identify the guarantor of the review                                                                                                                                           | 13          |
| Amendments                        | 4       | If the protocol represents an amendment of a previously completed or published protocol, identify as such and list changes; otherwise, state plan for documenting important protocol amendments                               | N/A         |
| Support:                          |         |                                                                                                                                                                                                                               |             |
| Sources                           | 5a      | Indicate sources of financial or other support for the review                                                                                                                                                                 | 13          |
| Sponsor                           | 5b      | Provide name for the review funder and/or sponsor                                                                                                                                                                             | N/A         |
| Role of sponsor or funder         | 5c      | Describe roles of funder(s), sponsor(s), and/or institution(s), if any, in developing the protocol                                                                                                                            | N/A         |
| <b>INTRODUCTION</b>               |         |                                                                                                                                                                                                                               |             |
| Rationale                         | 6       | Describe the rationale for the review in the context of what is already known                                                                                                                                                 | 3/4         |
| Objectives                        | 7       | Provide an explicit statement of the question(s) the review will address with reference to participants, interventions, comparators, and outcomes (PICO)                                                                      | 4           |
| <b>METHODS</b>                    |         |                                                                                                                                                                                                                               |             |
| Eligibility criteria              | 8       | Specify the study characteristics (such as PICO, study design, setting, time frame) and report characteristics (such as years considered, language, publication status) to be used as criteria for eligibility for the review | 4/5         |
| Information sources               | 9       | Describe all intended information sources (such as electronic databases, contact with study authors, trial registers or other grey literature sources) with planned dates of coverage                                         | 7           |
| Search strategy                   | 10      | Present draft of search strategy to be used for at least one electronic database, including planned limits, such that it could be repeated                                                                                    | 7           |

|                                    |     |                                                                                                                                                                                                                                                  |     |
|------------------------------------|-----|--------------------------------------------------------------------------------------------------------------------------------------------------------------------------------------------------------------------------------------------------|-----|
| Study records:                     |     |                                                                                                                                                                                                                                                  |     |
| Data management                    | 11a | Describe the mechanism(s) that will be used to manage records and data throughout the review                                                                                                                                                     | 7   |
| Selection process                  | 11b | State the process that will be used for selecting studies (such as two independent reviewers) through each phase of the review (that is, screening, eligibility and inclusion in meta-analysis)                                                  | 7   |
| Data collection process            | 11c | Describe planned method of extracting data from reports (such as piloting forms, done independently, in duplicate), any processes for obtaining and confirming data from investigators                                                           | 7   |
| Data items                         | 12  | List and define all variables for which data will be sought (such as PICO items, funding sources), any pre-planned data assumptions and simplifications                                                                                          | 8/9 |
| Outcomes and prioritization        | 13  | List and define all outcomes for which data will be sought, including prioritization of main and additional outcomes, with rationale                                                                                                             | 7/8 |
| Risk of bias in individual studies | 14  | Describe anticipated methods for assessing risk of bias of individual studies, including whether this will be done at the outcome or study level, or both; state how this information will be used in data synthesis                             | 8   |
| Data synthesis                     | 15a | Describe criteria under which study data will be quantitatively synthesised                                                                                                                                                                      | 8/9 |
|                                    | 15b | If data are appropriate for quantitative synthesis, describe planned summary measures, methods of handling data and methods of combining data from studies, including any planned exploration of consistency (such as $I^2$ , Kendall's $\tau$ ) | 8/9 |
|                                    | 15c | Describe any proposed additional analyses (such as sensitivity or subgroup analyses, meta-regression)                                                                                                                                            | 8/9 |
|                                    | 15d | If quantitative synthesis is not appropriate, describe the type of summary planned                                                                                                                                                               |     |
| Meta-bias(es)                      | 16  | Specify any planned assessment of meta-bias(es) (such as publication bias across studies, selective reporting within studies)                                                                                                                    | 9   |
| Confidence in cumulative evidence  | 17  | Describe how the strength of the body of evidence will be assessed (such as GRADE)                                                                                                                                                               | 9   |

**\* It is strongly recommended that this checklist be read in conjunction with the PRISMA-P Explanation and Elaboration (cite when available) for important clarification on the items. Amendments to a review protocol should be tracked and dated. The copyright for PRISMA-P (including checklist) is held by the PRISMA-P Group and is distributed under a Creative Commons Attribution Licence 4.0.**

*From: Shamseer L, Moher D, Clarke M, Ghersi D, Liberati A, Petticrew M, Shekelle P, Stewart L, PRISMA-P Group. Preferred reporting items for systematic review and meta-analysis protocols (PRISMA-P) 2015: elaboration and explanation. BMJ. 2015 Jan 2;349(jan02 1):g7647.*

# BMJ Open

## Protocol for a systematic review and meta-analysis of the placebo response in treatment-resistant depression: Comparison of multiple treatment modalities

|                                 |                                                                                                                                                                                                                                                                                                            |
|---------------------------------|------------------------------------------------------------------------------------------------------------------------------------------------------------------------------------------------------------------------------------------------------------------------------------------------------------|
| Journal:                        | <i>BMJ Open</i>                                                                                                                                                                                                                                                                                            |
| Manuscript ID                   | bmjopen-2020-041349.R1                                                                                                                                                                                                                                                                                     |
| Article Type:                   | Protocol                                                                                                                                                                                                                                                                                                   |
| Date Submitted by the Author:   | 09-Dec-2020                                                                                                                                                                                                                                                                                                |
| Complete List of Authors:       | Jones, Brett; Centre for Addiction and Mental Health, Weissman, Cory; Centre for Addiction and Mental Health<br>Razza, Lais; Univ Sao Paulo<br>Husain, Muhammad; University of Toronto<br>Brunoni, Andre R.; Univ Sao Paulo<br>Daskalakis, Zafiris; Centre for Addiction and Mental Health, Temerty Centre |
| <b>Primary Subject Heading</b>: | Mental health                                                                                                                                                                                                                                                                                              |
| Secondary Subject Heading:      | Evidence based practice                                                                                                                                                                                                                                                                                    |
| Keywords:                       | Depression & mood disorders < PSYCHIATRY, Adult psychiatry < PSYCHIATRY, Clinical trials < THERAPEUTICS                                                                                                                                                                                                    |
|                                 |                                                                                                                                                                                                                                                                                                            |

SCHOLARONE™  
Manuscripts





I, the Submitting Author has the right to grant and does grant on behalf of all authors of the Work (as defined in the below author licence), an exclusive licence and/or a non-exclusive licence for contributions from authors who are: i) UK Crown employees; ii) where BMJ has agreed a CC-BY licence shall apply, and/or iii) in accordance with the terms applicable for US Federal Government officers or employees acting as part of their official duties; on a worldwide, perpetual, irrevocable, royalty-free basis to BMJ Publishing Group Ltd ("BMJ") its licensees and where the relevant Journal is co-owned by BMJ to the co-owners of the Journal, to publish the Work in this journal and any other BMJ products and to exploit all rights, as set out in our [licence](#).

The Submitting Author accepts and understands that any supply made under these terms is made by BMJ to the Submitting Author unless you are acting as an employee on behalf of your employer or a postgraduate student of an affiliated institution which is paying any applicable article publishing charge ("APC") for Open Access articles. Where the Submitting Author wishes to make the Work available on an Open Access basis (and intends to pay the relevant APC), the terms of reuse of such Open Access shall be governed by a Creative Commons licence – details of these licences and which [Creative Commons](#) licence will apply to this Work are set out in our licence referred to above.

Other than as permitted in any relevant BMJ Author's Self Archiving Policies, I confirm this Work has not been accepted for publication elsewhere, is not being considered for publication elsewhere and does not duplicate material already published. I confirm all authors consent to publication of this Work and authorise the granting of this licence.

# Protocol for a systematic review and meta-analysis of the placebo response in treatment-resistant depression: Comparison of multiple treatment modalities

## Brett DM Jones, MD, MSc

- Department of Psychiatry, Faculty of Medicine, Centre for Addiction and Mental Health (CAMH), University of Toronto, Toronto, ON, Canada
- brett.jones@mail.utoronto.ca

## Cory Weissman, MD

- Department of Psychiatry, Faculty of Medicine, Centre for Addiction and Mental Health (CAMH), University of Toronto, Toronto, ON, Canada
- Cory.Weissman@camh.ca

## Lais B Razza

- Department of Internal Medicine, Faculdade de Medicina da Universidade de São Paulo, São Paulo, Brazil; Laboratory of Neurosciences (LIM-27), Department and Institute of Psychiatry, Faculdade de Medicina da Universidade de São Paulo, São Paulo, Brazil; Center for Clinical and Epidemiological Research, Hospital Universitário, Universidade de São Paulo (HU-USP), Av. Prof Lineu Prestes 2565, Butantã, CEP 05508-000 São Paulo, Brazil
- lais.razza@usp.br

## Muhammad I. Husain MBBS, MD(Res.), MRCPsych

- Department of Psychiatry, Faculty of Medicine, Centre for Addiction and Mental Health (CAMH), University of Toronto, Toronto, ON, Canada
- Ishrat.husain@camh.ca

## Andre R Brunoni, MD PhD

- Department of Internal Medicine, Faculdade de Medicina da Universidade de São Paulo, São Paulo, Brazil; Laboratory of Neurosciences (LIM-27), Department and Institute of Psychiatry, Faculdade de Medicina da Universidade de São Paulo, São Paulo, Brazil; Center for Clinical and Epidemiological Research, Hospital Universitário, Universidade de São Paulo (HU-USP), Av. Prof Lineu Prestes 2565, Butantã, CEP 05508-000 São Paulo, Brazil

- brunoni@usp.br

**Zafiris J Daskalakis, MD PhD (Corresponding Author)**

- Department of Psychiatry, Faculty of Medicine, Centre for Addiction and Mental Health (CAMH), University of Toronto, Toronto, ON, Canada
- Centre for Addiction and Mental Health, 100 Stokes Street, Toronto, Ontario, Canada, M6J 1H4
- Jeff.daskalakis@camh.ca

For peer review only

1  
2  
3 **Abstract:**  
4  
5  
6

7 **Introduction:** The high placebo response in depression treatment trials is a major  
8  
9  
10 contributing factor for randomized control trial (RCT) failure to establish efficacy of novel  
11  
12  
13 or repurposed treatments in treatment resistant depression (TRD) and Major  
14  
15  
16 Depressive Disorder (MDD) in general. Though there have been a number of meta-  
17  
18  
19 analyses and primary research studies evaluating the placebo response in non-TRD  
20  
21  
22 depression, placebo response in TRD is poorly understood. It is important to understand  
23  
24  
25 the placebo response of TRD as treatments are only moderately effective and up to 1/3  
26  
27  
28 of patients will experience treatment-resistant depression (TRD).  
29  
30  
31  
32  
33

34 **Methods and Analysis:** We will conduct a search of electronic databases (MEDLINE and  
35  
36  
37 PsychINFO) from inception to January 24<sup>th</sup> 2020 including randomized, placebo-  
38  
39  
40 controlled controlled trials of pharmacological, somatic and psychological interventions  
41  
42  
43 for adults with TRD. TRD will be defined as a failure to respond to at least 2  
44  
45  
46 interventions of adequate dose or duration. We will also search reference lists from  
47  
48  
49 review articles. We will perform several meta-analyses to quantify the placebo response  
50  
51  
52  
53 for each treatment modality. Regression analysis will explore potential contributing  
54  
55  
56  
57  
58  
59  
60

1  
2  
3 demographic and clinical variables to the placebo response. We will utilize Cochrane  
4  
5  
6  
7 risk of bias tool (ROB).  
8  
9

10 **Ethics and dissemination:** There is no research ethics board approval required. The  
11  
12  
13  
14 dissemination plan is to publish results in a peer-reviewed academic journal.  
15  
16  
17  
18  
19  
20

21 Prospero ID: 190465  
22  
23  
24  
25  
26  
27

28 **Strengths and limitations of this study:**  
29  
30  
31  
32  
33  
34

35 This analysis will be the first to exclusively study the placebo response in TRD.  
36  
37  
38  
39  
40  
41

42 We will seek to quantify the placebo response among distinct treatment modalities.  
43  
44  
45  
46  
47  
48

49 The study will assess a large number of variables that may contribute to the placebo  
50  
51  
52 response.  
53  
54  
55  
56  
57  
58  
59  
60

1  
2  
3 Direct statistical comparison between the placebo response of treatment modalities will  
4  
5  
6  
7 not be done given the significant heterogeneity among treatment modalities.  
8  
9  
10  
11  
12  
13  
14  
15  
16  
17  
18  
19  
20

### 21 Introduction:

22  
23  
24  
25  
26  
27

28 The placebo response is the therapeutic effect produced by a placebo intervention that  
29  
30  
31 is not due to any inherent properties of the placebo itself. The high placebo response in  
32  
33  
34 large depression treatment trials is a major contributing factor for RCT failure to  
35  
36  
37 establish efficacy of novel and repurposed treatments (1). There have been several  
38  
39  
40  
41  
42 studies attempting to determine patient and study variables contributing to the placebo  
43  
44  
45 response in non-TRD depression. Variables found to contribute to the placebo response  
46  
47  
48 include year of publication, baseline severity, probability of being allocated to placebo  
49  
50  
51  
52 arm, number of clinic centers, dosing schedule, length of trial, the magnitude active  
53  
54  
55 response, early score fluctuations, and inflation of baseline severity (2–10). The largest  
56  
57  
58  
59  
60

1  
2  
3 meta-analysis to date (252 studies, pooled n= 26,324) reported that the placebo  
4  
5  
6  
7 response rate of anti-depressant medications has been stable over the last thirty years  
8  
9  
10 and ranges between 35% and 40% (11). While the placebo response is extensively  
11  
12  
13 investigated in non-TRD depression, there is a paucity of research into the magnitude of  
14  
15  
16  
17 the placebo response in TRD.  
18  
19  
20  
21  
22  
23

24 TRD is defined by a lack of response to at least 2 separate treatments and imposes a  
25  
26  
27 heavy burden on the individual, their families, and society; through decreased quality of  
28  
29  
30  
31 life, increased morbidity and direct/indirect medical costs (12,13). It is important to  
32  
33  
34 integrate novel treatments into clinical practice; however, a high placebo response and  
35  
36  
37 negative clinical trials has led to a delay in this regard. To address this gap, it is  
38  
39  
40  
41 important characterize and understand the placebo response in TRD. Two meta-  
42  
43  
44  
45 analyses have explored the placebo response in repetitive transcranial magnetic  
46  
47  
48 stimulation (rTMS) trials, including TRD and non-TRD patients which reported a large  
49  
50  
51  
52 placebo response (14,15). To date these are the only studies attempting the  
53  
54  
55  
56 characterize the placebo response in TRD.  
57  
58  
59  
60

1  
2  
3  
4 Currently, there is not a clear understanding as to what the placebo response in TRD is,  
5  
6  
7 what contributes to it, and how it may differ across various treatment modalities. Hence,  
8  
9  
10 we will complete a systematic review and meta-analysis of randomized-placebo-  
11  
12  
13  
14 controlled trials in TRD. Our primary objective will be to characterize the placebo  
15  
16  
17 response in TRD across various treatment modalities. Our exploratory aim will be to  
18  
19  
20  
21 determine any demographic, clinical, and methodological characteristics contribute to it.  
22  
23  
24 Characterizing and understanding what contributes to the placebo response in TRD is a  
25  
26  
27 crucial step towards the advancement of emerging treatments as well as potentially  
28  
29  
30  
31 harnessing the placebo response for patients.  
32  
33  
34  
35  
36  
37

### 38 **Methods and Analysis:**

39  
40  
41  
42  
43  
44  
45 This protocol will be developed and reported in accordance with PRISMA  
46  
47  
48  
49 statement.(16)  
50  
51  
52  
53  
54

### 55 **Eligibility Criteria:**



### ***Participants and Setting:***

We will include RCTs that recruited: TRD patients of any gender and between 18 and 65 years old. Treatment-resistant depression will be defined as patients with MDD as defined by The Diagnostic and Statistical Manual of Mental Disorders (DSM) III, IV, IV-R and 5 or international classification of diseases (ICD) 9-10 that are currently in a depressive episode (17–19). Patients must have failed at least two trials of antidepressant medication within the current depressive episode with adequate dose and duration. Within class switches (e.g. 2 selective serotonin reuptake inhibitors (SSRI's) will be included as part of the TRD staging (20). Failed psychotherapy or brain stimulation trials will be included in the TRD staging. If a study reported that they included patients with 2 failed trials, but did not indicate whether this occurred within the current depressive episode, the study will be included as this is the most consistent definition of TRD (21–23). Patients from any setting (i.e. inpatient or outpatient) will be included. Psychiatric comorbidity will be included, if MDD is the primary psychiatric disorder being treated.

1  
2  
3 We will exclude: Studies that recruited patients with bipolar depression, unless 15% or  
4  
5  
6  
7 less of the patients randomized were bipolar depression. Patients diagnosed with  
8  
9  
10 primary psychotic illness or active substance use disorders. Patients with neurological  
11  
12  
13 disorders, physical co-morbidities, or medical conditions will only be excluded if these  
14  
15  
16 diagnoses are the primary diagnosis (e.g. MDD in patients with diabetes or MDD in  
17  
18  
19 patients with multiple sclerosis). Studies with sample sizes less than 10 subjects (24).  
20  
21  
22  
23  
24 Studies that utilize a non-inert placebo.  
25  
26  
27  
28  
29  
30

31 ***Interventions:***  
32  
33

34  
35 We will include pharmacological and somatic therapies that are included in the  
36  
37  
38 Maudsley Treatment Inventory (MTI)(25). This inventory is derived from the Maudsley  
39  
40  
41 Prescribing Guidelines as well as other standardised guidelines for depression  
42  
43  
44  
45 treatment. We will also include novel and repurposed agents that have multiple meta-  
46  
47  
48  
49 analysis supporting their use.  
50  
51  
52  
53  
54  
55  
56  
57  
58  
59  
60

1  
2  
3 For psychological agents, we will include those from the NICE guidelines which includes  
4  
5  
6  
7 computerised or face-to-face CBT, behavioural activation, interpersonal therapy,  
8  
9  
10 manualised psychodynamic therapy, behavioural couples' therapy, cognitive  
11  
12  
13 behavioural analysis system of psychotherapy, or mindfulness-based cognitive  
14  
15  
16  
17 therapy.(22)  
18  
19  
20  
21  
22  
23

24 ***Comparator:***

25  
26  
27  
28 Trials that include a placebo arm. Placebo will be defined as an inert oral medication,  
29  
30  
31 parental medication, sham device, or sham therapy that does not include any theoretical  
32  
33  
34 active property to induce the proposed therapeutic effect. Wait-list or treatment as usual  
35  
36  
37  
38 will not be considered a placebo group for therapy trials.  
39  
40  
41  
42  
43  
44

45 ***Study designs and publication types:***

46  
47  
48  
49 We will only include parallel arm, randomized double-blind placebo-controlled trials. We  
50  
51  
52 will include cross-over studies if they report outcomes before the cross-over. Trials must  
53  
54  
55 include randomization to at least 1 placebo arm.  
56  
57  
58  
59  
60

1  
2  
3  
4  
5  
6  
7 ***Language and Timeframe:***  
8  
9

10 Studies to be included will be published in English or Portuguese. Attempts to translate  
11  
12  
13 other languages will also be made. Time frame of included studies will be from the date  
14  
15  
16  
17 of inception until January 24<sup>th</sup> 2020.  
18  
19  
20  
21  
22  
23  
24

25 **Information Source and Search Strategy:**  
26  
27

28 The electronic databases MEDLINE and PsychInfo will be searched. Key terms, notable  
29  
30  
31 papers and citation lists will also be reviewed for additional studies. The following  
32  
33  
34  
35 search terms will used in addition to mapping key terms: (depress\* OR MDD OR major  
36  
37  
38 depress\*) AND (resistan\* OR refractor\* OR non-respon\* OR nonrespon\* OR un-respon\*  
39  
40  
41 OR unrespon\* OR TRD OR fail\* OR inadequate OR difficult OR intractable) AND  
42  
43  
44  
45  
46 (Placebo OR sham OR control OR controlled) AND (randomi\* OR RCT) AND (treatment  
47  
48  
49  
50 OR intervention OR trial).  
51  
52

53 **Study Records:**  
54  
55  
56  
57  
58  
59  
60

1  
2  
3  
4 ***Study Selection and Data Extraction:*** Two authors will independently screen the  
5  
6  
7 abstracts and full-texts to decide on their inclusion based on predefined inclusion  
8  
9  
10 criteria. Any discrepancies of inclusion or extraction will be discussed between the two  
11  
12  
13 authors, and a third author will resolve any further conflicts. Two authors will then  
14  
15  
16 extract data which will include description of the interventions and control group,  
17  
18  
19 demographics, clinical data, and quality assessment.  
20  
21  
22

#### 23 24 **Outcomes:**

##### 25 26 27 ***Primary outcome:***

28  
29  
30  
31 The primary outcome will be 'placebo response' as measured by Cohen's d effect size  
32  
33  
34 of the change in the primary outcome variable (i.e. depression symptom rating scales)  
35  
36  
37 from baseline to primary endpoint. Where multiple outcomes are reported, the primary  
38  
39  
40 outcome for inclusion in analyses will be selected in a hierarchical fashion: the most  
41  
42  
43 preferable scale will be a clinician-rated assessment of depression severity (HAM-D,  
44  
45  
46 MADRS, IDS or validated subscales of these), followed by a patient-rated measure  
47  
48  
49 (PHQ-9, IDS or BDI). Where multiple endpoints are reported, this review will consider  
50  
51  
52  
53  
54  
55  
56  
57  
58  
59  
60

1  
2  
3 the acute endpoint as the primary endpoint. If the study only reports a delayed endpoint,  
4  
5  
6  
7 this will be recorded and controlled for.  
8  
9

#### 10 11 12 13 14 *Secondary outcomes:*

- 15  
16  
17 1. Response rate measured by the total number of patients who had a reduction of  
18  
19  
20  
21  $\geq 50\%$  of the total score on a standardized rating scale for depression.  
22  
23
- 24 2. Remission rates as measured by a standardized rating scale for depression  
25  
26  
27  
28  
29  
30

#### 31 **Assessment of risk bias:**

32 We will utilize the Cochrane risk of Bias (RoB) tool. This tool assesses bias across five  
33  
34  
35 domains five domains (selection, performance, attrition, reporting, and other). A  
36  
37  
38  
39 sensitivity analysis will assess the difference in statistical effects between studies with a  
40  
41  
42  
43  
44  
45 high and low risk of bias.  
46  
47  
48  
49  
50

#### 51 52 **Data Synthesis:**

53  
54  
55  
56  
57  
58  
59  
60

1  
2  
3 Qualitative data will be analyzed, and sufficiently homogenous studies will be  
4  
5  
6  
7 aggregated based upon similarity of patient characteristics, treatment modality, as well  
8  
9  
10 as study design. We will conduct a pairwise meta-analysis within each modality.  
11  
12

13  
14 Placebo effect size will be determined by Hedge's  $g$ , which will be calculated based on  
15  
16  
17 reported means and standard deviations (SD) from baseline and endpoint of each  
18  
19  
20 study. A random-effects model will be used to perform this calculation. When  
21  
22  
23 necessary, we will impute SD based on graphs, standard errors, or confidence intervals  
24  
25  
26 provided in the published reports. The pooled effect size for each study will be  
27  
28  
29  
30  
31 calculated by the inverse variance of each study.  
32  
33

34  
35  
36  
37  
38 We will perform an explanatory analysis on factors affecting the placebo response using  
39  
40  
41 a univariate meta-regression. Several univariate meta-regressions will be performed for  
42  
43  
44 each treatment modality. Factors chosen will be dependent on data availability,  
45  
46  
47 however, examples include: methodological factors, publication year, number of study  
48  
49  
50 sites, study setting, number of treatment arms, industry sponsorship, duration of study,  
51  
52  
53 number of times placebo was measured, number of days receiving placebo, dosing  
54  
55  
56  
57  
58  
59  
60

1  
2  
3 (e.g. once daily vs twice daily), presence of a placebo run-in, augmentation vs  
4  
5  
6  
7 monotherapy treatment strategy, and study quality, as well as demographic factors (e.g.  
8  
9  
10 age, gender, and race/ethnicity), and clinical factors (e.g. number of failed trials in the  
11  
12  
13 current episode, recurrence of illness, age of onset, baseline severity, and effect size of  
14  
15  
16 the active group). For univariate meta-regression analyses, significant values will be  
17  
18  
19 considered as  $p < 0.05$ .  
20  
21  
22  
23

24 We will perform sensitivity analysis, cumulative regression and assess publication bias  
25  
26  
27 using Begg-modified funnel plot and Egger test (26). Heterogeneity will be evaluated  
28  
29  
30  
31 with a Chi-square test.  
32  
33  
34  
35  
36  
37

### 38 **Confidence of cumulative evidence:**

39  
40  
41 The Grading of Recommendations, Assessment, Development and Evaluations  
42  
43  
44 (GRADE) approach will be utilized to rank the quality of the evidence in making  
45  
46  
47  
48 recommendations of what the placebo response in TRD is.  
49  
50  
51

### 52 **Patient and Public involvement:**



1  
2  
3 TRD is a very significant public health concern. As there is no direct patient involvement  
4  
5  
6  
7 in this study, we have decided to not include patients and public in the development in  
8  
9  
10 the protocol.  
11  
12

### 13 14 **Discussion:**

15  
16  
17 A placebo-controlled clinical trial is the gold-standard for establishing efficacy of a  
18  
19  
20  
21 proposed active treatment. While there is a well-established understanding of the  
22  
23  
24 placebo response in treatment naive MDD, there is not a clear understanding of the  
25  
26  
27  
28 placebo response in TRD. Furthermore, the analyses of the placebo response in non-  
29  
30  
31 TRD focuses almost entirely on the placebo response as it relates to oral medications.  
32  
33  
34  
35 This has implications on the transferability of this knowledge to TRD as this patient  
36  
37  
38 population frequently utilizes somatic and novel treatments. The objective of this study  
39  
40  
41  
42 is to better quantify the placebo response in TRD, its contributing factors, and how it  
43  
44  
45 may differ between treatment modalities. This knowledge will help clinicians and  
46  
47  
48  
49 researchers interpret past and future studies as well as improve the design and  
50  
51  
52 development of future trials. With an established placebo response, study designs such  
53  
54  
55  
56  
57  
58  
59  
60

1  
2  
3 a non-inferiority, can be utilized with improved confidence. Lastly, this knowledge would  
4  
5  
6  
7 have implications of how care can be delivered and improved for patients with TRD.  
8  
9

10 **Ethics and dissemination:** There is no research ethics board approval required. The  
11  
12  
13  
14 dissemination plan is to publish results in a peer-reviewed academic journal.  
15  
16  
17  
18  
19  
20  
21  
22  
23  
24

25 **Reference:**  
26  
27  
28  
29

- 30  
31 1. N. Fountoulakis K, S. McIntyre R, F. Carvalho A. From Randomized Controlled  
32 Trials of Antidepressant Drugs to the Meta-Analytic Synthesis of Evidence:  
33 Methodological Aspects Lead to Discrepant Findings.  
34  
35  
36  
37 2. Timothy Walsh B, Seidman SN, Sysko R, Gould M. Placebo response in studies  
38 of major depression: Variable, substantial, and growing. Vol. 287, Journal of the  
39 American Medical Association. American Medical Association; 2002. p. 1840–7.  
40  
41  
42  
43 3. Khan A, Bhat A, Kolts R, Thase ME, Brown W. Why has the antidepressant-  
44 placebo difference in antidepressant clinical trials diminished over the past three  
45 decades? CNS Neurosci Ther. 2010;16(4):217–26.  
46  
47  
48  
49 4. Sinyor M, Levitt A, Cheung A, ... AS-TJ of clinical, 2010 undefined. Does  
50 inclusion of a placebo arm influence response to active antidepressant treatment  
51 in randomized controlled trials? Results from pooled and meta-analyses.  
52  
53  
54 psycnet.apa.org [Internet]. [cited 2020 Apr 13]; Available from:  
55  
56  
57  
58  
59  
60

- 1  
2  
3  
4 <https://psycnet.apa.org/record/2012-02346-008>  
5  
6 5. Iovieno N, Popakostas GI. Does the presence of an open-label antidepressant  
7 treatment period influence study outcome in clinical trials examining  
8 augmentation/combination strategies in treatment partial  
9 responders/nonresponders with major depressive disorder? *J Clin Psychiatry*  
10 [Internet]. 2012 May;73(5):676–83. Available from:  
11 <http://myaccess.library.utoronto.ca/login?url=https://search.proquest.com/docview/1373442277?accountid=14771>  
12  
13  
14  
15  
16  
17  
18  
19 6. Khan A, Khan S, Walens G, ... RK-, 2003 undefined. Frequency of positive  
20 studies among fixed and flexible dose antidepressant clinical trials: An analysis of  
21 the Food and Drug Administration summary basis of. *nature.com* [Internet]. [cited  
22 2020 Apr 13]; Available from: <https://www.nature.com/articles/1300059>  
23  
24  
25  
26  
27 7. Landin R, DeBroda DJ, DeVries TA, Potter WZ, Demitrack MA. The Impact of  
28 Restrictive Entry Criterion During the Placebo Lead-in Period. *Biometrics*  
29 [Internet]. 2000 Mar 1 [cited 2020 Apr 13];56(1):271–8. Available from:  
30 <http://doi.wiley.com/10.1111/j.0006-341X.2000.00271.x>  
31  
32  
33  
34  
35 8. Rutherford B, Cooper T, ... AP-TJ of clinical, 2013 undefined. Less is more in  
36 antidepressant clinical trials: a meta-analysis of the effect of visit frequency on  
37 treatment response and drop-out. *ncbi.nlm.nih.gov* [Internet]. [cited 2020 Apr 13];  
38 Available from: <https://www.ncbi.nlm.nih.gov/pmc/articles/PMC3898620/>  
39  
40  
41  
42  
43 9. Whitlock ME, Woodward PW, Alexander RC. Is high placebo response really a  
44 problem in depression trials? A critical re-analysis of depression studies. *Innov*  
45 *Clin Neurosci*. 2019;16(7–8):12–7.  
46  
47  
48  
49 10. Targum SD, Cameron BR, Ferreira L, MacDonald ID. Early score fluctuation and  
50 placebo response in a study of major depressive disorder. *J Psychiatr Res*. 2020  
51 Feb 1;121:118–25.  
52  
53  
54  
55 11. Furukawa TA, Cipriani A, Atkinson LZ, Leucht S, Ogawa Y, Takeshima N, et al.  
56  
57  
58  
59

- 1  
2  
3  
4 Placebo response rates in antidepressant trials: a systematic review of published  
5 and unpublished double-blind randomised controlled studies. *The Lancet*  
6 *Psychiatry*. 2016 Nov 1;3(11):1059–66.  
7  
8  
9  
10 12. Rush AJ, Warden D, Wisniewski SR, Fava M, Trivedi MH, Gaynes BN, et al.  
11 STAR\*D: Revising conventional wisdom. *CNS Drugs* [Internet]. 2009 Aug  
12 8;23(8):627–47. Available from:  
13 [http://myaccess.library.utoronto.ca/login?url=https://search.proquest.com/docview](http://myaccess.library.utoronto.ca/login?url=https://search.proquest.com/docview/622067060?accountid=14771)  
14 [/622067060?accountid=14771](http://myaccess.library.utoronto.ca/login?url=https://search.proquest.com/docview/622067060?accountid=14771)  
15  
16  
17  
18  
19 13. Johnston KM, Powell LC, Anderson IM, Szabo S, Cline S. The burden of  
20 treatment-resistant depression: A systematic review of the economic and quality  
21 of life literature. Vol. 242, *Journal of Affective Disorders*. Elsevier B.V.; 2019. p.  
22 195–210.  
23  
24  
25  
26  
27 14. Razza LB, Moffa AH, Moreno ML, Carvalho AF, Padberg F, Fregni F, et al. A  
28 systematic review and meta-analysis on placebo response to repetitive  
29 transcranial magnetic stimulation for depression trials. *Prog*  
30 *Neuropsychopharmacol Biol Psychiatry* [Internet]. 2018 Feb 2;81:105–13.  
31 Available from:  
32 [http://myaccess.library.utoronto.ca/login?url=https://search.proquest.com/docview](http://myaccess.library.utoronto.ca/login?url=https://search.proquest.com/docview/1970301414?accountid=14771)  
33 [/1970301414?accountid=14771](http://myaccess.library.utoronto.ca/login?url=https://search.proquest.com/docview/1970301414?accountid=14771)  
34  
35  
36  
37  
38  
39  
40 15. Brunoni AR, Lopes M, Kaptchuk TJ, Fregni F. Placebo response of non-  
41 pharmacological and pharmacological trials in major depression: a systematic  
42 review and meta-analysis. *PLoS One* [Internet]. 2009 Mar 18 [cited 2020 Apr  
43 3];4(3):e4824. Available from: <http://www.ncbi.nlm.nih.gov/pubmed/19293925>  
44  
45  
46  
47  
48 16. Shamseer L, Moher D, Clarke M, Gherzi D, Liberati A, Petticrew M, et al.  
49 Preferred reporting items for systematic review and meta-analysis protocols  
50 (prisma-p) 2015: Elaboration and explanation. *BMJ* (Online). 2015.  
51  
52  
53  
54 17. WHO. The ICD-10 Classification of Mental and Behavioural Disorders Clinical  
55 descriptions and diagnostic guidelines World Health Organization [Internet]. [cited  
56  
57  
58  
59  
60

- 1  
2  
3  
4 2018 Oct 10]. Available from:  
5 <http://www.who.int/classifications/icd/en/bluebook.pdf>  
6  
7  
8 18. First M, Gibbon M, Spitzer R, Williams J. User Guide for the Structural Clinical  
9 Interview for DSM-IV Axis I Disorders. APA. Washington, DC: American  
10 Psychiatric Association; 1996.  
11  
12  
13  
14 19. Diagnostic and Statistical Manual of mental disorders (4ed). 4th ed. Washington,  
15 DC: American Psychiatric Association; 1994.  
16  
17  
18 20. Papakostas GI, Fava M, Thase ME. Treatment of SSRI-resistant depression: A  
19 meta-analysis comparing within- versus across-class switches. *Biol Psychiatry*  
20 [Internet]. 2008 Apr;63(7):699–704. Available from:  
21 <http://myaccess.library.utoronto.ca/login?url=https://search.proquest.com/docview/622141982?accountid=14771>  
22  
23  
24  
25  
26  
27  
28 21. Souery D, Amsterdam J, de Montigny C, Lecrubier Y, Montgomery S, Lipp O, et  
29 al. Treatment resistant depression: methodological overview and operational  
30 criteria. *Eur Neuropsychopharmacol* [Internet]. 1999 Jan [cited 2018 Oct 10];9(1–  
31 2):83–91. Available from: <http://www.ncbi.nlm.nih.gov/pubmed/10082232>  
32  
33  
34  
35  
36 22. NICE. Depression in Adults (update) Depression: the treatment and management  
37 of depression in adults National Clinical Practice Guideline Number X National  
38 Collaborating Centre for Mental Health Commissioned by the National Institute for  
39 Health and Clinical Exc. 2007.  
40  
41  
42  
43 23. Anderson I, Ferrier I, Baldwin R, Cowen P, Howard L, Lewis G, et al. Evidence-  
44 based guidelines for treating depressive disorders with antidepressants: A  
45 revision of the 2000 British Association for Psychopharmacology guidelines. *J*  
46 *Psychopharmacol* [Internet]. 2008 Jun 15 [cited 2018 Oct 11];22(4):343–96.  
47 Available from: <http://www.ncbi.nlm.nih.gov/pubmed/18413657>  
48  
49  
50  
51  
52  
53 24. Bandelow B, Reitt M, Röver C, Michaelis S, Görlich Y, Wedekind D. Efficacy of  
54 treatments for anxiety disorders. *Int Clin Psychopharmacol* [Internet]. 2015 Jul  
55  
56  
57  
58  
59  
60

1  
2  
3  
4 [cited 2018 Oct 10];30(4):183–92. Available from:

5 <http://www.ncbi.nlm.nih.gov/pubmed/25932596>  
6  
7

- 8 25. Fekadu A, Wooderson SC, Markopoulou K, Cleare AJ. The Maudsley Staging  
9 Method for treatment-resistant depression: Prediction of longer-term outcome and  
10 persistence of symptoms. J Clin Psychiatry [Internet]. 2009 Jul;70(7):952–7.

11 Available from:

12 <http://myaccess.library.utoronto.ca/login?url=https://search.proquest.com/docview/622097738?accountid=14771>  
13  
14  
15  
16  
17

- 18  
19 26. Egger M, Smith GD, Schneider M, Minder C. Bias in meta-analysis detected by a  
20 simple , graphical test measures of funnel plot asymmetry. Bmj [Internet]. 1997

21 [cited 2020 Mar 30];315(7109):629–34. Available from:

22 <http://www.ncbi.nlm.nih.gov/pubmed/9310563>  
23 <http://www.pubmedcentral.nih.gov/articlerender.fcgi?artid=PMC2127453>  
24  
25  
26  
27  
28  
29  
30

31 **Authors' contributions:** Brett DM Jones, MD, MSc: made an exceptional contribution to  
32 the design/conception of the protocol; wrote the original version of the manuscript; gave  
33 final approval of the version published; has agreed to be accountable for all aspects of  
34 the work in ensuring that questions related to the accuracy or integrity of any part of the  
35 work are appropriately investigated and resolved.  
36  
37  
38  
39  
40  
41  
42  
43  
44  
45  
46  
47  
48  
49  
50  
51  
52  
53  
54  
55  
56  
57  
58  
59  
60

1  
2  
3  
4  
5  
6  
7  
8 Cory Weissman, MD: made an exceptional contribution to the design/conception of the  
9  
10  
11 protocol; made significant contributions to revisions of the manuscript; gave final  
12  
13  
14 approval of the version published; has agreed to be accountable for all aspects of the  
15  
16 work in ensuring that questions related to the accuracy or integrity of any part of the  
17  
18  
19 work are appropriately investigated and resolved.  
20  
21  
22  
23  
24  
25  
26  
27  
28  
29  
30

31 Lais B Razza: made an exceptional contribution to the design/conception of the  
32  
33  
34 protocol; made significant contributions to revisions of the manuscript; gave final  
35  
36 approval of the version published; has agreed to be accountable for all aspects of the  
37  
38  
39 work in ensuring that questions related to the accuracy or integrity of any part of the  
40  
41  
42 work are appropriately investigated and resolved.  
43  
44  
45  
46  
47  
48  
49  
50  
51  
52  
53  
54  
55  
56  
57  
58  
59  
60

1  
2  
3  
4 Muhammad I. Husain MBBS, MD(Res.), MRCPsych: made an exceptional contribution  
5  
6  
7 to the design/conception of the protocol; made significant contributions to revisions of  
8  
9  
10 the manuscript; gave final approval of the version published; has agreed to be  
11  
12  
13 accountable for all aspects of the work in ensuring that questions related to the  
14  
15  
16 accuracy or integrity of any part of the work are appropriately investigated and resolved.  
17  
18  
19  
20  
21  
22  
23  
24  
25  
26

27 Andre R Brunoni, MD PhD: made an exceptional contribution to the design/conception  
28  
29  
30 of the protocol; made significant contributions to revisions of the manuscript; gave final  
31  
32  
33 approval of the version published; has agreed to be accountable for all aspects of the  
34  
35  
36 work in ensuring that questions related to the accuracy or integrity of any part of the  
37  
38  
39  
40  
41 work are appropriately investigated and resolved.  
42  
43  
44  
45  
46  
47  
48  
49

50 Zafiris J Daskalakis, MD PhD (Corresponding Author): made an exceptional contribution  
51  
52  
53 to the design/conception of the protocol; made significant contributions to revisions of  
54  
55  
56  
57  
58  
59  
60



1  
2  
3 the manuscript; gave final approval of the version published; has agreed to be  
4  
5  
6  
7 accountable for all aspects of the work in ensuring that questions related to the  
8  
9  
10 accuracy or integrity of any part of the work are appropriately investigated and resolved.  
11  
12  
13

14  
15 **Funding statement:** This research received no specific grant from any funding agency  
16  
17  
18 in the public, commercial or not-for-profit sectors.  
19  
20  
21  
22

23 **Competing interests' statement:** There are no competing interests to report.  
24  
25  
26  
27

28 **Patient consent for publication** Not required  
29  
30  
31  
32  
33  
34  
35  
36  
37  
38  
39  
40  
41  
42  
43  
44  
45  
46  
47  
48  
49  
50  
51  
52  
53  
54  
55  
56  
57  
58  
59  
60

**PRISMA-P (Preferred Reporting Items for Systematic review and Meta-Analysis Protocols) 2015 checklist: recommended items to address in a systematic review protocol\***

| Section and topic                 | Item No | Checklist item                                                                                                                                                                                                                | (Page No.#) |
|-----------------------------------|---------|-------------------------------------------------------------------------------------------------------------------------------------------------------------------------------------------------------------------------------|-------------|
| <b>ADMINISTRATIVE INFORMATION</b> |         |                                                                                                                                                                                                                               |             |
| Title:                            |         |                                                                                                                                                                                                                               |             |
| Identification                    | 1a      | Identify the report as a protocol of a systematic review                                                                                                                                                                      | 1           |
| Update                            | 1b      | If the protocol is for an update of a previous systematic review, identify as such                                                                                                                                            | N/A         |
| Registration                      | 2       | If registered, provide the name of the registry (such as PROSPERO) and registration number                                                                                                                                    | 2           |
| Authors:                          |         |                                                                                                                                                                                                                               |             |
| Contact                           | 3a      | Provide name, institutional affiliation, e-mail address of all protocol authors; provide physical mailing address of corresponding author                                                                                     | 1           |
| Contributions                     | 3b      | Describe contributions of protocol authors and identify the guarantor of the review                                                                                                                                           | 13          |
| Amendments                        | 4       | If the protocol represents an amendment of a previously completed or published protocol, identify as such and list changes; otherwise, state plan for documenting important protocol amendments                               | N/A         |
| Support:                          |         |                                                                                                                                                                                                                               |             |
| Sources                           | 5a      | Indicate sources of financial or other support for the review                                                                                                                                                                 | 13          |
| Sponsor                           | 5b      | Provide name for the review funder and/or sponsor                                                                                                                                                                             | N/A         |
| Role of sponsor or funder         | 5c      | Describe roles of funder(s), sponsor(s), and/or institution(s), if any, in developing the protocol                                                                                                                            | N/A         |
| <b>INTRODUCTION</b>               |         |                                                                                                                                                                                                                               |             |
| Rationale                         | 6       | Describe the rationale for the review in the context of what is already known                                                                                                                                                 | 3/4         |
| Objectives                        | 7       | Provide an explicit statement of the question(s) the review will address with reference to participants, interventions, comparators, and outcomes (PICO)                                                                      | 4           |
| <b>METHODS</b>                    |         |                                                                                                                                                                                                                               |             |
| Eligibility criteria              | 8       | Specify the study characteristics (such as PICO, study design, setting, time frame) and report characteristics (such as years considered, language, publication status) to be used as criteria for eligibility for the review | 4/5         |
| Information sources               | 9       | Describe all intended information sources (such as electronic databases, contact with study authors, trial registers or other grey literature sources) with planned dates of coverage                                         | 7           |
| Search strategy                   | 10      | Present draft of search strategy to be used for at least one electronic database, including planned limits, such that it could be repeated                                                                                    | 7           |

|                                    |     |                                                                                                                                                                                                                                                  |     |
|------------------------------------|-----|--------------------------------------------------------------------------------------------------------------------------------------------------------------------------------------------------------------------------------------------------|-----|
| Study records:                     |     |                                                                                                                                                                                                                                                  |     |
| Data management                    | 11a | Describe the mechanism(s) that will be used to manage records and data throughout the review                                                                                                                                                     | 7   |
| Selection process                  | 11b | State the process that will be used for selecting studies (such as two independent reviewers) through each phase of the review (that is, screening, eligibility and inclusion in meta-analysis)                                                  | 7   |
| Data collection process            | 11c | Describe planned method of extracting data from reports (such as piloting forms, done independently, in duplicate), any processes for obtaining and confirming data from investigators                                                           | 7   |
| Data items                         | 12  | List and define all variables for which data will be sought (such as PICO items, funding sources), any pre-planned data assumptions and simplifications                                                                                          | 8/9 |
| Outcomes and prioritization        | 13  | List and define all outcomes for which data will be sought, including prioritization of main and additional outcomes, with rationale                                                                                                             | 7/8 |
| Risk of bias in individual studies | 14  | Describe anticipated methods for assessing risk of bias of individual studies, including whether this will be done at the outcome or study level, or both; state how this information will be used in data synthesis                             | 8   |
| Data synthesis                     | 15a | Describe criteria under which study data will be quantitatively synthesised                                                                                                                                                                      | 8/9 |
|                                    | 15b | If data are appropriate for quantitative synthesis, describe planned summary measures, methods of handling data and methods of combining data from studies, including any planned exploration of consistency (such as $I^2$ , Kendall's $\tau$ ) | 8/9 |
|                                    | 15c | Describe any proposed additional analyses (such as sensitivity or subgroup analyses, meta-regression)                                                                                                                                            | 8/9 |
|                                    | 15d | If quantitative synthesis is not appropriate, describe the type of summary planned                                                                                                                                                               |     |
| Meta-bias(es)                      | 16  | Specify any planned assessment of meta-bias(es) (such as publication bias across studies, selective reporting within studies)                                                                                                                    | 9   |
| Confidence in cumulative evidence  | 17  | Describe how the strength of the body of evidence will be assessed (such as GRADE)                                                                                                                                                               | 9   |

**\* It is strongly recommended that this checklist be read in conjunction with the PRISMA-P Explanation and Elaboration (cite when available) for important clarification on the items. Amendments to a review protocol should be tracked and dated. The copyright for PRISMA-P (including checklist) is held by the PRISMA-P Group and is distributed under a Creative Commons Attribution Licence 4.0.**

*From: Shamseer L, Moher D, Clarke M, Ghersi D, Liberati A, Petticrew M, Shekelle P, Stewart L, PRISMA-P Group. Preferred reporting items for systematic review and meta-analysis protocols (PRISMA-P) 2015: elaboration and explanation. BMJ. 2015 Jan 2;349(jan02 1):g7647.*
